# Supplementary material
Source: PubMed Central journal article supplement (PMC3339950)
Supplement: supp_M112.341826_jbc.M112.341826-1.pdf [file supp_M112.341826_jbc.M112.341826-1.pdf]

## **SUPPLEMENTAL DATA**

SPLICE-SPECIFIC ALTERATIONS OF GEPHYRIN IN GLYCINE RECEPTOR  
BINDING, FOLDING AND PHOSPHORYLATION

**Jens Herweg and Guenter Schwarz**

From <sup>1</sup>Institute of Biochemistry, Department of Chemistry and Center for Molecular  
Medicine, University of Cologne, 50674 Cologne

Address correspondence to: Guenter Schwarz, Zuelpicher Str. 47, 50674 Cologne, Germany,  
+49 221 470 6441, Fax: +49 221 470 5092, E-mail: [gschwarz@uni-koeln.de](mailto:gschwarz@uni-koeln.de)

## **SUPPLEMENTAL FIGURES**

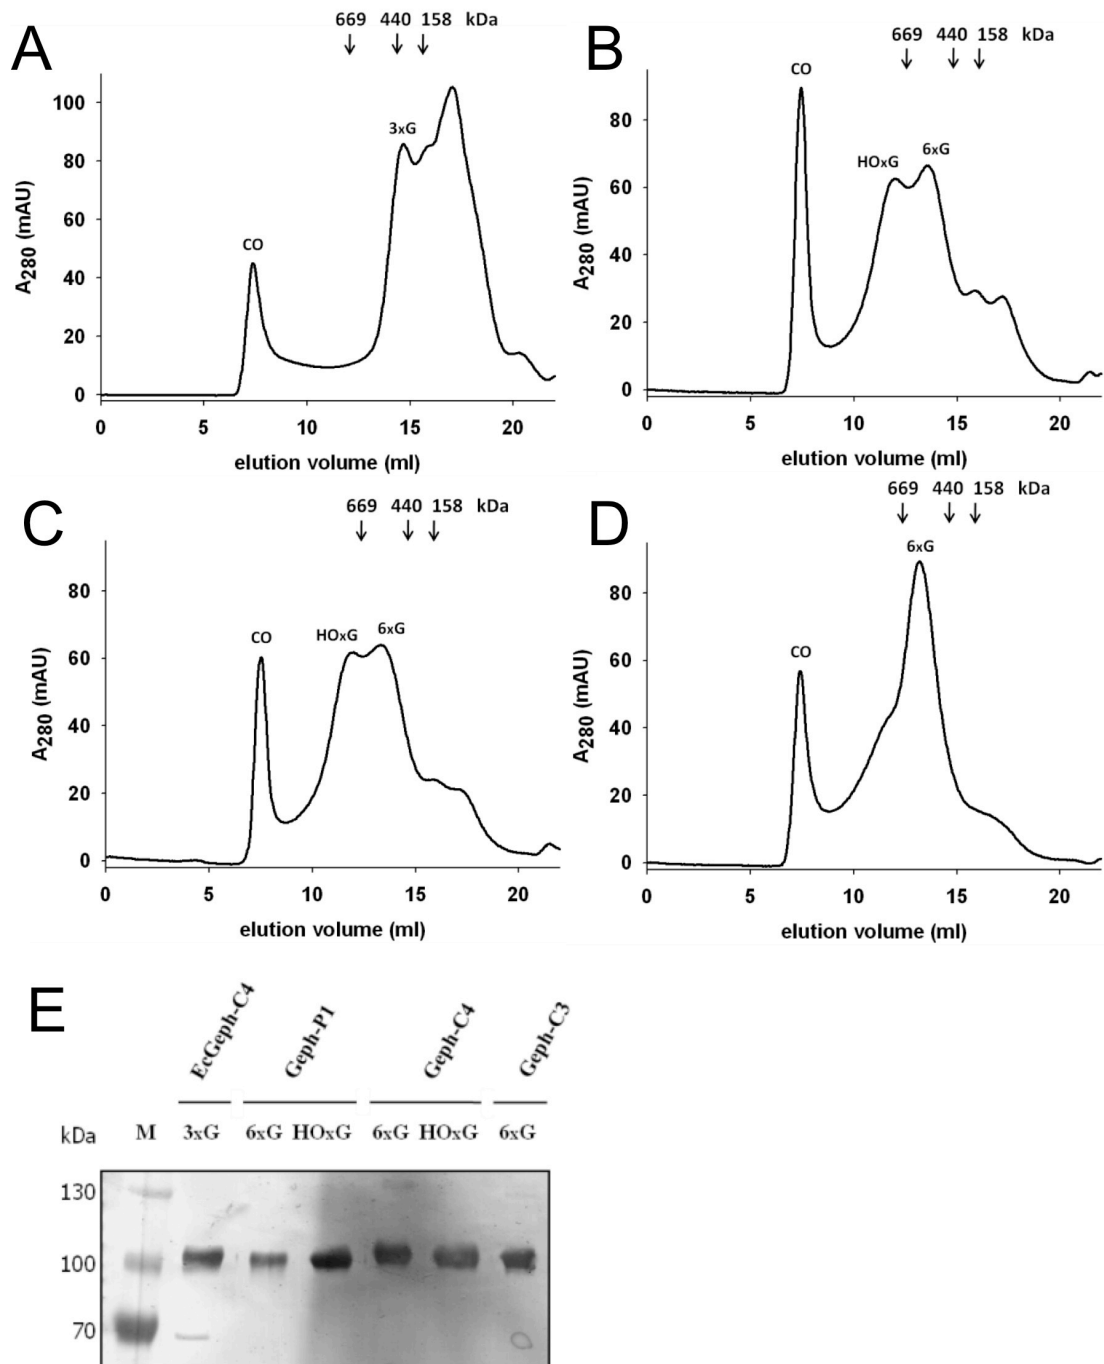

**Supplemental Fig. S1:** Molecular mass determination of Ni-NTA purified gephyrin splice variants A-D, size exclusion chromatography of EcGeph-C4 derived from *E. coli* (A), Geph (B), Geph-C4 (C) and Geph-C3 (D) derived from Sf9 cells using a 20 ml Superose 6 column. Molecular masses of gephyrin oligomers were determined by comparison to standard proteins as described under Experimental Procedures. Elution volumes of standard proteins with their corresponding molecular masses are highlighted by arrows. Different oligomerization states are indicated by symbols: 3xG, trimer; 6xG, hexamer; HOxG, high-oligomer. Identification of gephyrin oligomers was confirmed by Western blot using the m3B11 antibody (E). CO = cut-off peak

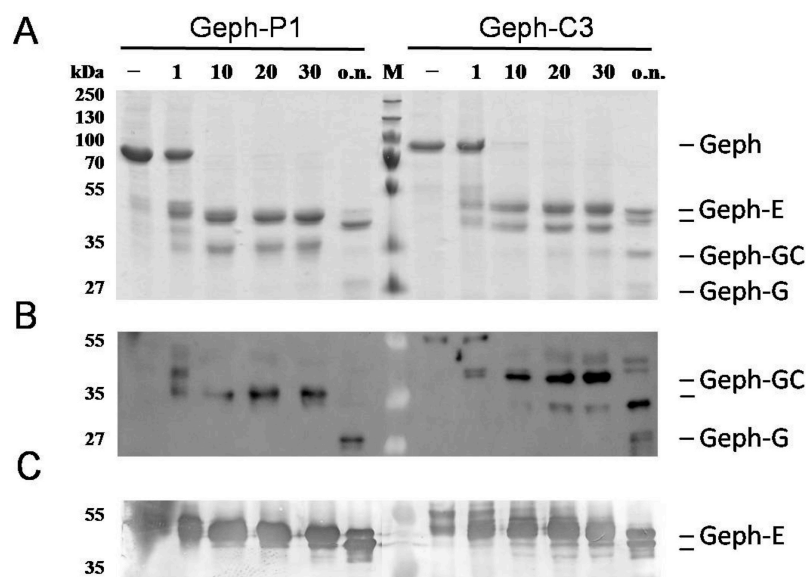

**Supplemental Fig. S2:** Partial proteolysis of Geph and Geph-C3. Sf9 cell-derived Geph (left) and Geph-C3 (right) were digested (6  $\mu$ g each) with trypsin at the indicated gephyrin/protease molar ratio and separated by a 12% SDS-PAGE (A) together with equal amounts of untreated protein (-). Identification of gephyrin fragments was confirmed by Western blot using domain specific antibodies detecting the G domain (B; "puszta serum"), and E-domain (C; m3B11).

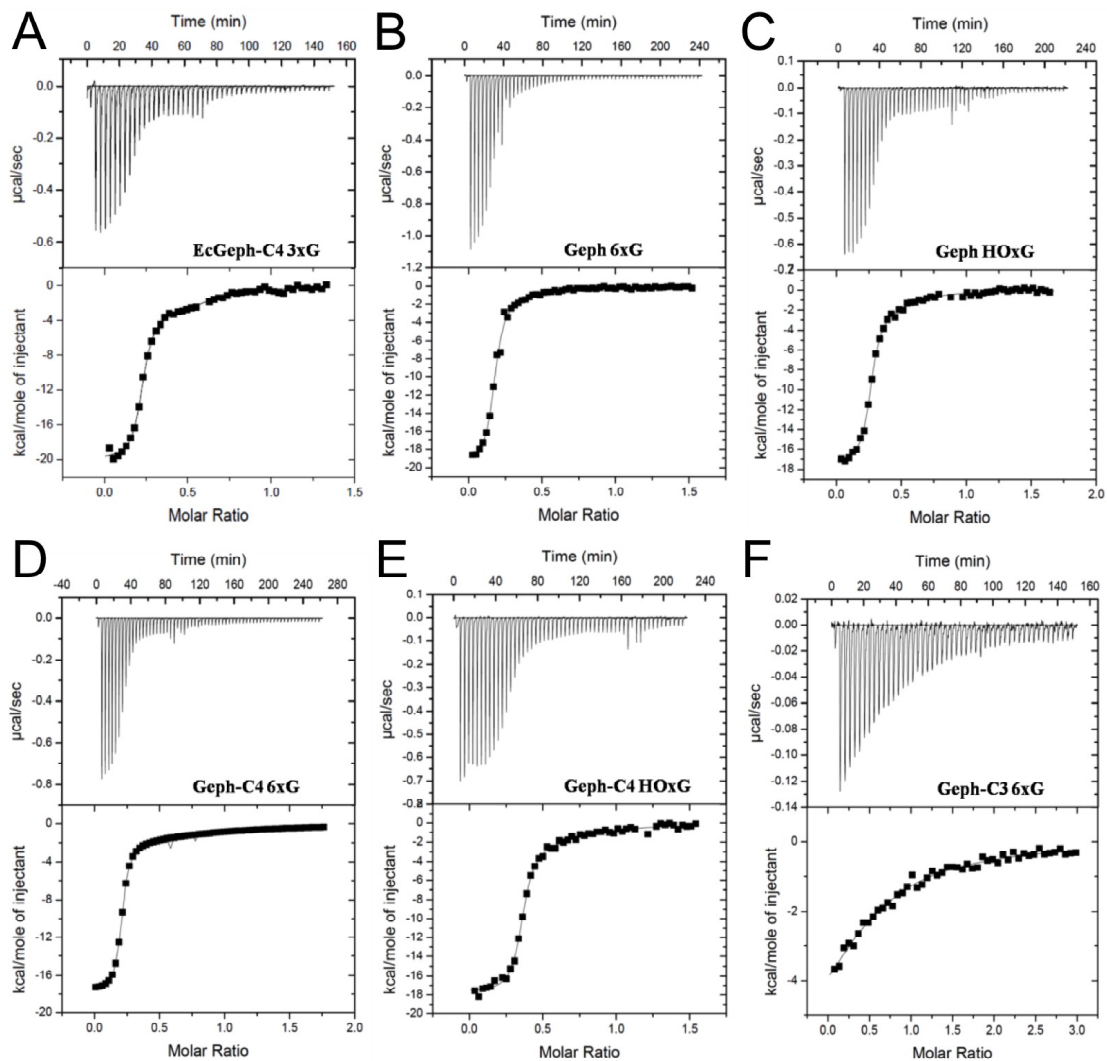

**Supplemental Fig. S3:** Determination of binding affinity between gephyrin splice variants and GlyR  $\beta$ -loop using isothermal titration calorimetry (ITC). A-D, titration of purified trimeric EcGeph-C4 (A), hexameric Geph (B), high-oligomeric Geph (C) hexameric Geph-C4 (D), high-oligomeric Geph-C4 (E) and hexameric Geph-C3 (F) with the GlyR  $\beta$ -loop showing the heats of injection (top) and the binding isotherm (bottom) with the experimental data points (*black squares*) and determined curve fitting (*thin line*) as described in the Results section. All experiments were carried out under the same conditions. For data analysis, the heat release of the first injection in each experiment was omitted.
